# Supplementary material
Source: PubMed Central journal article supplement (PMC165875)

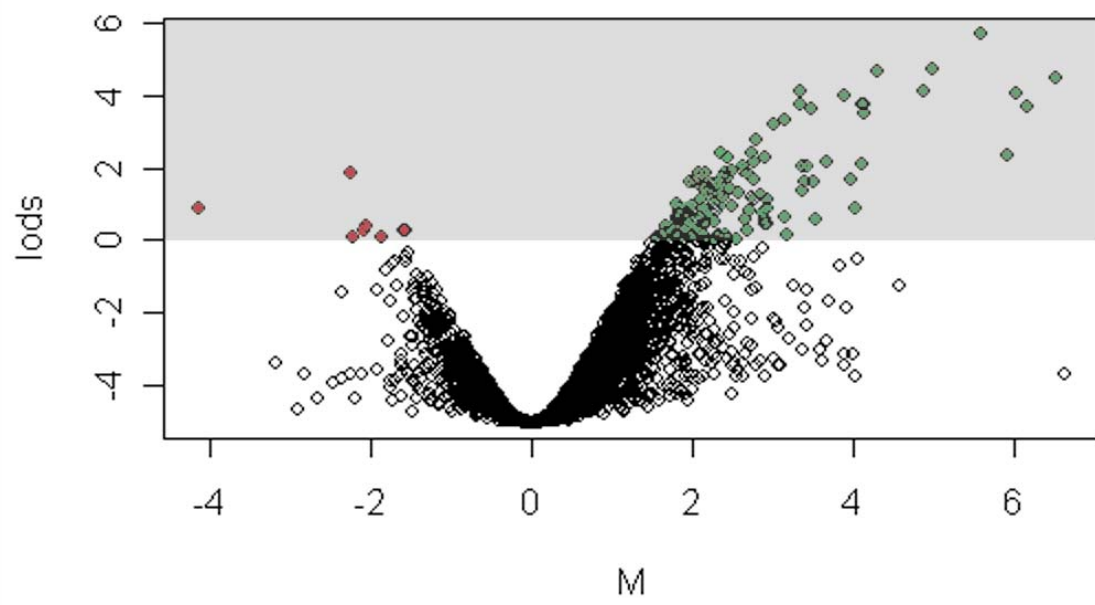

Supplement: pnas_0832317100_3.pdf [file pnas_0832317100_3.pdf]
